# Supplementary material for: Differences in Expression of Mitochondrial Complexes Due to Genetic Variants May Alter Sensitivity to Radiation-Induced Cardiac Dysfunction
Source: PubMed Central journal article supplement (PMC7066205; doi:10.3389/fcvm.2020.00023), 2020-03-05
Supplement: Data_Sheet_1.pdf [file Data_Sheet_1.pdf]

**Supplemental Table 1A. Expression of Nuclear-Encoded Mitochondrial Complex Genes in SS.BN3 versus SS Left Ventricles 1 Week After 24 Gy of Localized Heart Radiation.**

| Differentially Expressed Genes in SS versus SS.BN3 Left Ventricles<br>Nuclear-encoded Mitochondrial Complex Genes |                |            |                |                                     |
|-------------------------------------------------------------------------------------------------------------------|----------------|------------|----------------|-------------------------------------|
| Symbol                                                                                                            | Entrez Gene ID | Chromosome | Expr Log Ratio | Expr False Discovery Rate (q-value) |
| Atp5me                                                                                                            |                | 14         | -0.855386253   | 0.026097496                         |
| Cox6a1                                                                                                            | 25282          | 12         | -0.942094326   | 2.54E-14                            |
| Ndufv3                                                                                                            | 64539          | 20         | -1.167884751   | 3.06E-07                            |
| Atp5pf                                                                                                            | 94271          | 11         | -1.946448273   | 3.38E-27                            |
| Atp5mc3                                                                                                           | 114630         | 3          | -2.561395584   | 3.28E-26                            |
| Atp5po                                                                                                            | 192241         | 11         | -1.673777528   | 1.57E-12                            |
| Ndufb4                                                                                                            | 288088         | 11         | -1.75533924    | 4.72E-16                            |
| Atp5f1b                                                                                                           | 171374         | 7          | -2.871582953   | 1.98E-33                            |
| Sdhc                                                                                                              | 289217         | 13         | -2.453035729   | 2.84E-124                           |
| Ndufa8                                                                                                            | 296658         | 3          | -2.033450948   | 4.22E-52                            |
| Ndufa5                                                                                                            | 25488          | 4          | -0.856508205   | 0.001200898                         |
| Ndufa7                                                                                                            | 299643         | 7          | -1.83052046    | 6.92E-19                            |
| Atp5mc1                                                                                                           | 29754          | 10         | -2.764657728   | 1.97E-14                            |
| Ndufa12                                                                                                           | 299739         | 7          | -1.649584684   | 1.25E-12                            |
| Cox4i2                                                                                                            | 84683          | 3          | 0.1508469      | 0.511309637                         |
| Sdhb                                                                                                              | 298596         | 5          | -2.221737952   | 1.34E-24                            |
| Ndufb11                                                                                                           | 299310         | X          | -2.016583236   | 1.20E-17                            |
| Ndufa6                                                                                                            | 315167         | 7          | -1.729950495   | 2.35E-17                            |
| Ndufs3                                                                                                            | 295923         | 3          | -2.44678498    | 3.65E-40                            |
| Ndufb9                                                                                                            | 299954         | 7          | -1.541616741   | 3.86E-05                            |
| Cox6c                                                                                                             | 54322          | 7          | -2.344787413   | 8.42E-27                            |
| Ndufs4                                                                                                            | 499529         | 2          | -2.223161282   | 1.88E-35                            |
| Ndufb3                                                                                                            | 301427         | 9          | -1.589034636   | 1.91E-10                            |
| Ndufs1                                                                                                            | 301458         | 9          | -4.127417503   | 3.24E-275                           |
| Ndufb5                                                                                                            | 294964         | 2          | -2.32220647    | 3.02E-22                            |
| Ndufc2                                                                                                            | 293130         | 1          | -1.860643512   | 8.96E-17                            |
| Cyc1                                                                                                              | 300047         | 7          | -2.620803582   | 7.37E-57                            |
| Uqcrh                                                                                                             | 366448         | 5          | -2.360206435   | 5.10E-42                            |
| Atpif1                                                                                                            | 25392          | 5          | -0.882812331   | 3.36E-08                            |
| Sdha                                                                                                              | 157074         | 1          | -3.170298063   | 2.44E-251                           |
| Ndufb8                                                                                                            | 293991         | 1          | -2.427293661   | 1.46E-46                            |
| Ndufb10                                                                                                           | 681418         | 10         | -2.007510035   | 9.48E-27                            |
| Atp5f1d                                                                                                           | 245965         | 7          | -2.166173592   | 3.02E-36                            |
| Atp5mc2                                                                                                           | 171082         | 7          | -1.747232108   | 1.83E-38                            |
| LOC100911417                                                                                                      | 100911417      | 2          | -3.537089528   | 7.90E-241                           |

|              |           |    |              |             |
|--------------|-----------|----|--------------|-------------|
| Ndufa10      | 316632    | 9  | -3.034136769 | 3.39E-109   |
| Cox5b        | 94194     | 9  | -2.12911377  | 1.91E-09    |
| Uqcr11       | 690848    | 7  | -1.519113392 | 7.50E-10    |
| Atp5f1a      | 65262     | 18 | -3.92926468  | 7.71E-122   |
| Ndufs8       | 293652    | 1  | -1.961432302 | 2.89E-20    |
| Ndufa2       | 291660    | 18 | -1.708199268 | 7.68E-12    |
| Cox4i1       | 29445     | 19 | -1.878329295 | 8.33E-17    |
| Ndufv1       | 293655    | 1  | -2.493156607 | 9.30E-43    |
| Ndufab1      | 293453    | 1  | -2.953223559 | 1.19E-47    |
| Uqcfs1       | 291103    | 17 | -3.491615347 | 7.23E-113   |
| Cox5a        | 252934    | 8  | -2.90108086  | 2.63E-34    |
| Taf3         | 116550    | 17 | -3.275972006 | 6.33E-177   |
| Cox6a2       | 25278     | 1  | -2.076041801 | 3.20E-05    |
| LOC100911483 | 100911483 | 16 | -1.349327753 | 0.000265323 |
| Cox8a        | 171335    | 1  | -1.024358217 | 3.88E-14    |
| Sdhd         | 363061    | 8  | -2.767605428 | 1.42E-89    |
| Cox6b1       | 688869    | 1  | -2.058434822 | 9.22E-31    |
| Ndufb6       | 297990    | 5  | -2.478357183 | 3.14E-42    |
| Ndufs7       | 362837    | 7  | -1.430954879 | 6.00E-14    |
| Uqcrb        | 362897    | 7  | -1.725370083 | 5.58E-17    |
| Ndufb2       | 362344    | 4  | -0.981681574 | 3.06E-05    |
| Ndufs5       | 362588    | 5  | -1.456391305 | 3.44E-14    |
| Atp5mf       | 690441    | 12 | -1.773269603 | 3.27E-23    |
| Ndufb7       | 361385    | 19 | -0.951524446 | 0.012059338 |
| Atp5l        | 300677    | 8  | -1.72717547  | 1.53E-06    |
| Cox7c        | 100188937 | 2  | -2.009066265 | 1.68E-16    |
| Uqcrc1       | 301011    | 8  | -2.955716001 | 5.89E-51    |
| Uqcrc2       | 293448    | 1  | -3.294789394 | 2.58E-264   |
| Ndufc1       | 689938    | 2  | -2.359630348 | 8.72E-24    |
| Ndufs2       | 289218    | 13 | -2.792941564 | 2.60E-43    |
| Ndufa1       | 108348144 | X  | -1.356186305 | 0.007201069 |
| Ndufv2       | 81728     | 9  | -2.444826711 | 1.09E-29    |
| Cox7a2l2     | 29507     | 8  | -1.70754915  | 1.12E-11    |
| Cox7a1       | 100910772 | 1  | 0.300908829  | 0.343580708 |
| Uqcrcq       | 497902    | 10 | -1.522786644 | 1.97E-05    |
| Ndufa11      | 301123    | 9  | -1.525974579 | 6.49E-10    |
| Atp5f1e      | 245958    | 3  | -1.548052137 | 6.69E-12    |
| Cox7b        | 303393    | X  | -2.395873574 | 1.33E-21    |
| Uqcr10       | 685322    | 14 | -2.66833371  | 3.42E-51    |
| Ndufa3       | 691001    | 1  | -1.751903054 | 4.61E-13    |
| Ndufa9       | 362440    | 4  | -2.607866894 | 3.95E-31    |

**Supplemental Table 1B. Expression of Mitochondrial-Encoded Genes in SS.BN3 versus SS Left Ventricles 1 Week After 24 Gy of Localized Heart Radiation.**

| <b>Differentially Expressed Mitochondrial Genes in SS versus SS-BN3 Left Ventricles</b> |                       |                   |                       |                                            |
|-----------------------------------------------------------------------------------------|-----------------------|-------------------|-----------------------|--------------------------------------------|
| <b>Mitochondrial-encoded Genes</b>                                                      |                       |                   |                       |                                            |
| <b>Symbol</b>                                                                           | <b>Entrez Gene ID</b> | <b>Chromosome</b> | <b>Expr Log Ratio</b> | <b>Expr False Discovery Rate (q-value)</b> |
| Mt-nd6                                                                                  | 26203                 | MT                | 1.110277231           | 7.17E-12                                   |
| Mt-nd4                                                                                  | 26201                 | MT                | 1.158822309           | 7.04E-19                                   |
| Mt-nd5                                                                                  | 26202                 | MT                | 1.313418587           | 1.05E-22                                   |
| Mt-co2                                                                                  | 26198                 | MT                | 1.099804942           | 1.55E-15                                   |
| Mt-nd1                                                                                  | 26193                 | MT                | 1.075422829           | 1.26E-15                                   |
| Mt-cox3                                                                                 | 26204                 | MT                | 0.94898068            | 1.62E-14                                   |
| Mt-nd2                                                                                  | 26194                 | MT                | 1.16362266            | 3.28E-21                                   |
| Mt-nd4l                                                                                 | 26200                 | MT                | 1.359098464           | 4.44E-29                                   |
| Mt-cyb                                                                                  | 26192                 | MT                | 1.00441361            | 7.01E-17                                   |
| Mt-atp6                                                                                 | 26197                 | MT                | 1.008376595           | 1.41E-15                                   |
| Mt-atp8                                                                                 | 26196                 | MT                | 1.141528399           | 1.41E-19                                   |
| Mt-nd3                                                                                  | 26199                 | MT                | 0.956194609           | 2.99E-15                                   |
| Mt-co1                                                                                  | 26195                 | MT                | 1.018705868           | 6.86E-18                                   |
